## SHARPIN stabilizes estrogen receptor $\alpha$ and promotes breast cancer cell proliferation

Ting Zhuang<sup>1,2,\*</sup>, Sifan Yu<sup>1,2,3\*</sup>, Lichen Zhang<sup>1,2,4\*</sup>, Huijie Yang<sup>1,2</sup>, Xin Li<sup>1,2</sup>, Yingxiang Hou<sup>1,2</sup>, Zhenhua Liu<sup>1,2,5</sup>, Yuanyuan Shi<sup>1,2</sup>, Weilong Wang<sup>6,7</sup>, Na Yu<sup>6,7</sup>, Anqi Li<sup>1,2,8</sup>, Xuefeng Li<sup>9</sup>, Xiumin Li<sup>6,7</sup>, Gang Niu<sup>10,11,12</sup>, Juntao Xu<sup>10,11,12</sup>, Muhammad Sharif Hasni<sup>12,13</sup>, Kun Mu<sup>14</sup>, Hui Wang<sup>1,2</sup> and Jian Zhu<sup>1,2,15</sup>

<sup>1</sup>Research Center for Immunology, School of Laboratory Medicine, Xinxiang Medical University, Xinxiang, Henan, China

<sup>2</sup>Henan Collaborative Innovation Center of Molecular Diagnosis and Laboratory Medicine, Xinxiang Medical University, Xinxiang, Henan, China

<sup>3</sup>Key Laboratory of Carcinogenesis and Translational Research, Ministry of Education, Department of Renal Cancer and Melanoma, Peking University School of Oncology, Beijing Cancer Hospital and Institute, Beijing, China

<sup>4</sup>Laboratory of Genetic Regulators in the Immune System, School of Laboratory Medicine, Xinxiang Medical University, Xinxiang, Henan, China

<sup>5</sup>Synthetic Biology Remaking Engineering and Application Laboratory, School of Life Sciences and Technology, Xinxiang Medical University, Xinxiang, Henan, China

<sup>6</sup>Department of Gastroenterology, The Third Affiliated Hospital of Xinxiang Medical University, Xinxiang, Henan, China

<sup>7</sup>Center for Cancer Research, Xinxiang Medical University, Xinxiang, Henan, China

<sup>8</sup>School of International Education, Xinxiang Medical University, Xinxiang, Henan, China

<sup>9</sup>Department of Medical Oncology, The First Affiliated Hospital, University of South China, Hengyang, Hunan, China

<sup>10</sup>Department of Cancer genomics, LemonData biotech (Shenzhen) Ltd, Shenzhen, Guangdong, China

<sup>11</sup>Phil Rivers Technology (Beijing) Ltd. Beijing, China

<sup>12</sup>Institute of Biochemistry University of Balochistan, Quetta, Pakistan

<sup>13</sup>Department of Hematology and Transfusion Medicine, Lund University, Lund, Sweden

<sup>14</sup>Department of Pathology, School of Medicine, Shandong University, Jinan, Shandong, China

<sup>15</sup>Department of Molecular Biology, University of Texas Southwestern Medical Center, Dallas, Texas, USA

\*Ting Zhuang, Sifan Yu and Lichen Zhang contribute equally to this study

**Correspondence to:** Jian Zhu, **email:** jian.zhu@utsouthwestern.edu

Ting Zhuang, **email:** zhuangting\_83@qq.com

Hui Wang, **email:** wanghui@xxmu.edu.cn

Kun Mu, **email:** mukun@sdu.edu.cn

**Keywords:** SHARPIN, ER  $\alpha$ , breast cancer, ubiquitination, protein stability

**Received:** May 17, 2017

**Accepted:** June 29, 2017

**Published:** August 19, 2017

**Copyright:** Zhuang et al. This is an open-access article distributed under the terms of the Creative Commons Attribution License 3.0 (CC BY 3.0), which permits unrestricted use, distribution, and reproduction in any medium, provided the original author and source are credited.

### ABSTRACT

**Estrogen receptor  $\alpha$  is expressed in the majority of breast cancers and promotes estrogen-dependent cancer progression. In our study, we identified the novel E3 ubiquitin ligase SHARPIN function to facilitate ER $\alpha$  signaling. SHARPIN is highly expressed in human breast cancer and correlates with ER $\alpha$  protein level by immunohistochemistry. SHARPIN expression level correlates with poor prognosis in ER $\alpha$  positive breast cancer patients. SHARPIN depletion based RNA-sequence data shows that ER $\alpha$  signaling is a potential SHARPIN target. SHARPIN depletion significantly decreases ER $\alpha$  protein level, ER $\alpha$  target genes expression and estrogen response element activity in breast cancer cells, while SHARPIN overexpression could**

**reverse these effects. SHARPIN depletion significantly decreases estrogen stimulated cell proliferation in breast cancer cells, which effect could be further rescued by ER $\alpha$  overexpression. Further mechanistic study reveals that SHARPIN mainly localizes in the cytosol and interacts with ER $\alpha$  both in the cytosol and the nuclear. SHARPIN regulates ER $\alpha$  signaling through protein stability, not through gene expression. SHARPIN stabilizes ER $\alpha$  protein via prohibiting ER $\alpha$  protein poly-ubiquitination. Further study shows that SHARPIN could facilitate the mono-ubiquitination of ER $\alpha$  at K302/303 sites and facilitate ERE luciferase activity. Together, our findings propose a novel ER $\alpha$  modulation mechanism in supporting breast cancer cell growth, in which SHARPIN could be one suitable target for development of novel therapy for ER $\alpha$  positive breast cancer.**

## INTRODUCTION

Breast cancer causes the most frequent women cancer prevalence and mortality in the world [1]. Up to 70% breast cancer cases are driven by estrogen receptor  $\alpha$  (ER $\alpha$ ) and anti-estrogen based therapy bring significant survival benefits for breast cancer patients [2]. However, about half of endocrine treated patients endure relapse, making it a significant clinical problem [3]. Thus, it is urgent and necessary to understand the potential mechanisms and insight into the novel facets and modulatory factors for estrogen signaling, which could serve for the development of promising treatment strategies.

Several mechanisms were shown to account for hyper-activation of ER $\alpha$  and endocrine resistance in breast cancer [4–6]. Some are related to crosstalk of other oncogenic signaling including HER2, EGFR and NF- $\kappa$ B pathway [4, 7]. The others are associated with the modulatory factors, which could include ER $\alpha$  co-activators and protein modulators, including ubiquitination, SUMOylation and phosphorylation [8–10]. However, the detailed mechanism that how ER $\alpha$  protein and its signaling are controlled by these modulators still remains largely unclear. As a group of ubiquitin ligases have been shown to facilitate estrogen signaling in breast cancer cell, such as BRCA1, CHIP and RNF31, it may suggest ER signaling and turnover is tightly linked to ubiquitin-proteasome system [11–14].

The ER $\alpha$  protein stability and turnover could be controlled by several ubiquitination manners [15]. Interestingly, the ubiquitinated ER $\alpha$  does not necessary lead to decreased protein stability [16]. For example, ER $\alpha$  mono-ubiquitination causes increased protein stability and enhanced ER $\alpha$  signaling activity [13]. However, the cellular factors that trigger and recognize this type of modification need to be further characterized. Our current study identifies the ubiquitin associated protein SHARPIN (Shank-Interacting protein-like 1, SIPL1) as a novel ER $\alpha$  modulation factor. SHARPIN was firstly cloned from nerve cells and was found to endure gene amplification in several human cancers, including breast tumor [17–19]. However, its function in breast carcinogenesis and

estrogen signaling remains to be addressed. Here, we identify SHARPIN to control ER $\alpha$  ubiquitination and stability and thereby the transcriptional regulation of ER $\alpha$  target genes and breast cancer cell proliferation.

## RESULTS

### SHARPIN is higher expressed in breast tumor and correlates with ER $\alpha$ protein in breast cancer tissues

By analysis of TCGA public available database (<https://tcga-data.nci.nih.gov/>), we observe that SHARPIN mRNA level in breast cancer tissue is higher than normal breast tissue (Figure 1A), and SHARPIN mRNA level in breast cancer tissue is more likely to be higher compared with the adjacent normal breast tissue in individual breast cancer subtype (Figure 1B). In order to analyze the correlation between SHARPIN expression and breast cancer subtype markers, 133 breast tumor tissues are collected and immunohistochemistry (IHC) is applied for examine the protein level of SHARPIN, ER $\alpha$ , progesterone receptor (PR), human epidermal growth factor receptor-2 (HER2). The control staining is in Figure 1C. The pathological character and lymph node status data are also collected. The IHC results show that SHARPIN expression is positively correlated with ER $\alpha$  in clinical samples (Table 1). Then we measure the SHARPIN expression in both ER $\alpha$  positive cell lines (MCF-7 and T47D) and ER $\alpha$  negative cell lines (BT549 and MDAMB231) by western blot. Immuno-blotting shows that SHARPIN is ubiquitously expressed in both ER $\alpha$  positive and negative cell lines (Supplementary Figure 1A).

### SHARPIN facilitates ER $\alpha$ signaling and relates to poor prognosis in ER $\alpha$ positive breast cancer patients

Through analysis of the public available breast cancer survival data (<http://kmplot.com/analysis/>), we observe that SHARPIN expression correlates with poor relapse-free survival in ER $\alpha$  positive breast cancer

patient groups of GSE 7390 dataset, GSE6532 dataset and GSE17705 dataset (Figure 2A). In GSE1456 dataset, although the P value shows no statistically significant, the same trend can be observed as the other two datasets. To approach the function of SHARPIN in breast cancer cells in an unbiased way, we analyzed changes in previously generated global gene expression profiles following SHARPIN depletion in MCF-7 breast cancer cells (Assessing number: GSE77261). The pathway enrichment analysis reveals that SHARPIN depletion significantly changes several pathways, including ER $\alpha$  and PTEN (Figure 2B and Table 2). The regulatory effect of SHARPIN on PTEN/AKT was reported in previous and is observed from our RNA-sequence data [20]. By specific analysis of ER $\alpha$  signaling, we observe a group of ER $\alpha$  activating target genes are decreased, including ER $\alpha$  itself, while another group of ER $\alpha$  suppressing target genes are increased, such as CDKN1A and CDKN1B (Figure 2C and Table 3). These RNA sequence data indicate that SHARPIN might play a supportive role in ER $\alpha$  signaling.

## SHARPIN controls ER $\alpha$ signaling in breast cancer cells

In order to confirm the SHARPIN function in ER $\alpha$  signaling, we deplete SHARPIN by two individual siRNAs (Figure 3A and 3B). SHARPIN depletion significantly decreases ER $\alpha$  protein level in MCF7 and T47D cells (Figure 3C and Supplementary Figure 1B). However, SHARPIN depletion does not significantly change PR and HER2 protein level (Supplementary Figure 1C and 1D). In order to rule out the P53 regulatory effect on ER $\alpha$  protein, we double deplete both SHARPIN and P53. SHARPIN and P53 double depletion still manifests ER $\alpha$  protein decrease, which indicates that the regulatory role of SHARPIN on ER $\alpha$  protein is independent of P53 pathway (Supplementary Figure 1E). By examining ER $\alpha$  target genes, we find that SHARPIN depletion significantly decreases ER $\alpha$  classic target genes (PS2, PKIB and IL20) in both vehicle and estradiol (E2) treated condition (Figure 3D). By checking the estrogen response element (ERE) activity, it shows that inhibition of SHARPIN decreases

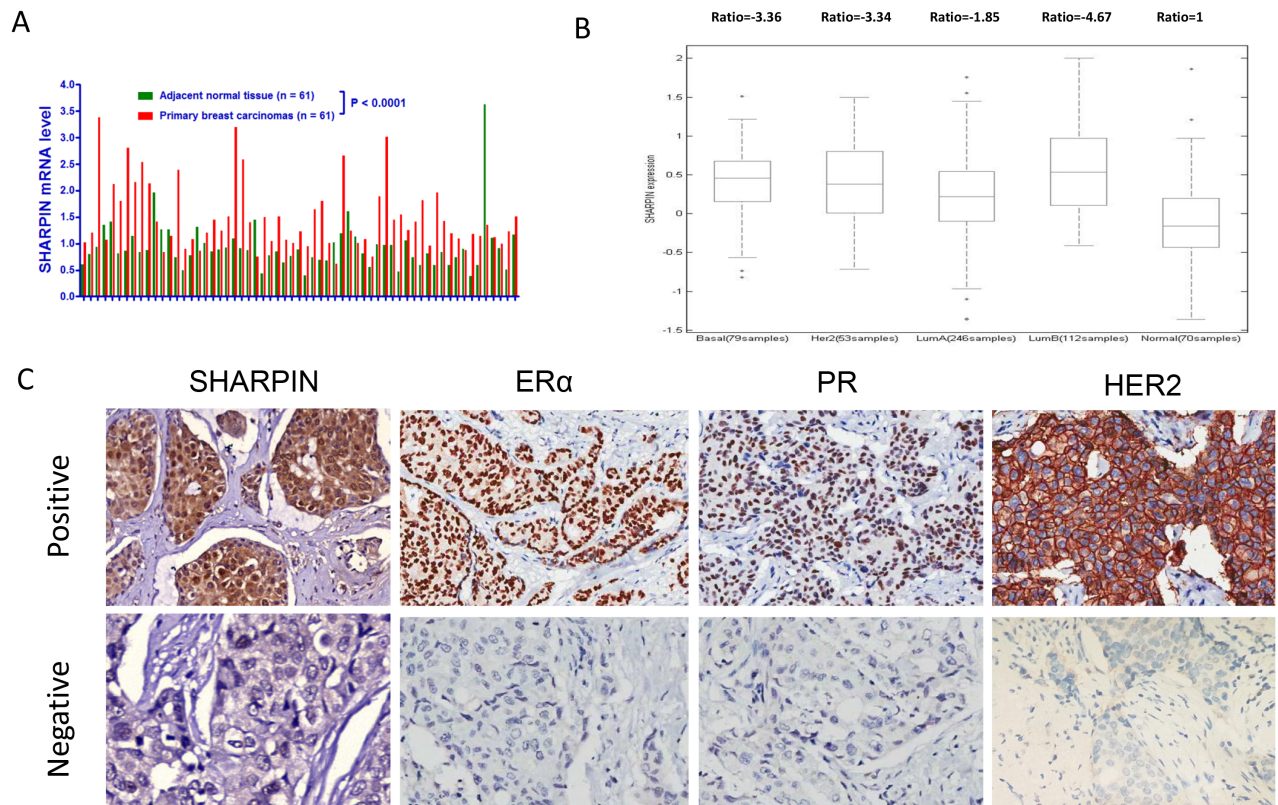

**Figure 1: SHARPIN is higher expressed in breast tumor, correlates with ER  $\alpha$  protein level in breast tumors.** (A) SHARPIN mRNA level comparison between paired breast tumor and adjacent normal breast tissue from TCGA database (date: 2016-09-20). (B) SHARPIN is higher expressed in different subtype of breast cancer samples. The SHARPIN mRNA expression data are acquired from TCGA database (date: 2016-09-20). (C) Examples of positive/negative SHARPIN, ER $\alpha$ , PR and HER2 staining in breast tumor samples were shown by X100 magnification. The statistical data of each protein marker are shown in Table 1.

**Table 1: SHARPIN correlates with ER $\alpha$ protein level in breast tumors**

| Clinical and molecular characteristics (Cases) | SHARPIN |    |    | P value |
|------------------------------------------------|---------|----|----|---------|
|                                                |         | +  | -  |         |
| ER $\alpha$                                    | +       | 69 | 9  | 0.017   |
|                                                | -       | 39 | 15 |         |
| PR                                             | +       | 45 | 5  | 0.096   |
|                                                | -       | 63 | 17 |         |
| HER2                                           | +       | 42 | 7  | 0.441   |
|                                                | -       | 57 | 14 |         |
| lymph node metastasis                          | +       | 49 | 24 | 0.177   |
|                                                | -       | 59 | 9  |         |
| pathological grade                             | low     | 3  | 0  | 0.573   |
|                                                | medium  | 71 | 18 |         |
|                                                | High    | 33 | 6  |         |

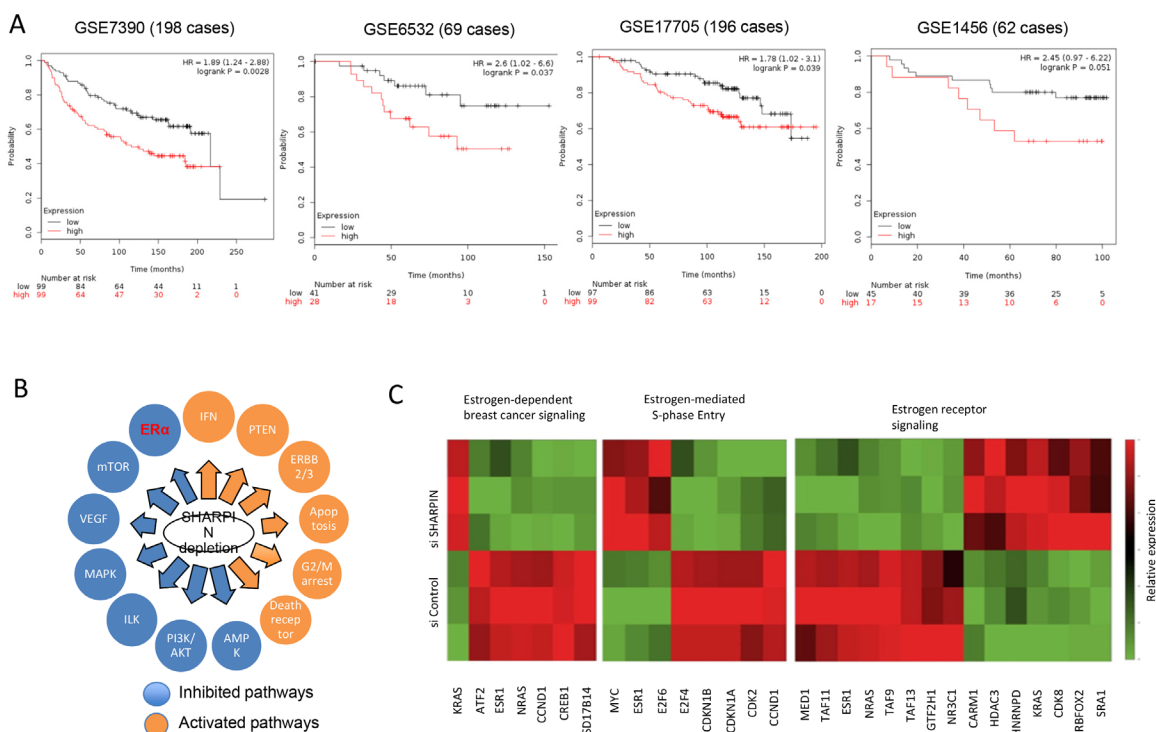

**Figure 2: SHARPIN is related to poor prognosis in ER $\alpha$  positive breast cancer patients and positive correlated with ER $\alpha$  signaling in unbiased RNA sequencing screening.** (A) Kaplan-Meier plot showing that high SHARPIN expression correlates with relapse free survival in ER+, tamoxifen treated patients stratified for high (red) and low (black) SHARPIN expression levels in GSE7390 dataset (n = 198; optimized cut-off; Probe 220973\_s\_at: HR = 1.98; 95% CI: 1.24–2.88; P = 0.0028); GSE6532 dataset (n = 69; optimized cut-off; Probe 220973\_s\_at: HR = 2.6; 95% CI: 1.02–6.6; P = 0.037) and GSE17705 dataset (n = 196; optimized cut-off; Probe 220973\_s\_at: HR = 1.78; 95% CI: 1.02–3.10; P = 0.039). In GSE1456 dataset (n = 62; optimized cut-off; Probe 220973\_s\_at: HR = 2.45; 95% CI: 0.97–6.22; P = 0.051), although the P value shows no statistically significant, the same trend can be observed as the other two datasets (date: 2016-09-20). (B) Schematic graph shows significantly changed signaling by SHARPIN depletion in MCF7 cells. The pathway-enrichment analysis was used by the threshold P<0.001 and fold change>2 to derive regulated genes. (C) The heat-map graph shows the ER $\alpha$  regulating genes, which is significantly changed by SHARPIN depletion in MCF-7 cells.

**Table 2: Related canonical pathway for activity analysis**

| Ingenuity Canonical Pathways                      | P value     | Ratio       | z-score      |
|---------------------------------------------------|-------------|-------------|--------------|
| Interferon Signaling                              | 0.00        | 0.31        | 3.16         |
| PTEN Signaling                                    | 0.01        | 0.14        | 1.50         |
| ErbB2-ErbB3 Signaling                             | 0.03        | 0.16        | 2.12         |
| Retinoic acid Mediated Apoptosis Signaling        | 0.03        | 0.16        | 1.89         |
| Cell Cycle: G2/M DNA Damage Checkpoint Regulation | 0.03        | 0.16        | 2.12         |
| Death Receptor Signaling                          | 0.04        | 0.13        | 1.73         |
| UVA-Induced MAPK Signaling                        | 0.07        | 0.13        | 1.90         |
| AMPK Signaling                                    | 0.00        | 0.15        | -1.70        |
| PI3K/AKT Signaling                                | 0.01        | 0.14        | -2.18        |
| ILK Signaling                                     | 0.02        | 0.12        | -2.24        |
| ERK/MAPK Signaling                                | 0.03        | 0.12        | -1.71        |
| NRF2-mediated Oxidative Stress Response           | 0.03        | 0.12        | -2.31        |
| VEGF Signaling                                    | 0.14        | 0.11        | -1.67        |
| <b>Estrogen-Dependent Breast Cancer Signaling</b> | <b>0.16</b> | <b>0.11</b> | <b>-1.63</b> |
| mTOR Signaling                                    | 4.92        | 0.10        | -1.81        |

ERE luciferase activity under both vehicle and E2-treated condition (Figure 3E). Consistent with this, SHARPIN overexpression significantly increases ER $\alpha$  protein level, ER $\alpha$  target genes and ERE luciferase activity (Figure 3F–3H). However, we do not observe the regulation of SHARPIN expression in both E2 and tamoxifen treatments (Supplementary Figure 2A and 2B).

### SHARPIN promotes E2-stimulated proliferation in breast cancer cells

To investigate the role of SHARPIN in cell proliferation, we utilize ER $\alpha$ -positive breast cancer cell MCF7 as a model. We deplete SHARPIN in MCF7 cells, while ER $\alpha$  depletion is used as the positive control (Figure 4A). The WST-1 assay shows that depletion of SHARPIN significantly decreases cell proliferation compared with siControl group (Figure 4A). Besides, SHARPIN depletion also decreases cell growth in T47D cells (Supplementary Figure 2C). The ethynyl-deoxyuridine (EdU) incorporation assay shows that depletion SHARPIN decreases EdU positive cells, which is similar as ER $\alpha$  depletion (Figure 4B, Supplementary Figure 3). In order to confirm the phenotype, flow cytometry based propidium iodide (PI) staining is used for cell cycle analysis. Both SHARPIN depletion and ER $\alpha$  depletion increase the cells in G1 phase (Figure 4C, Supplementary Figure 4A). We further perform the rescue experiment by transfection ER $\alpha$  into the SHARPIN depletion cells. ER $\alpha$  overexpression

could at least partially rescue the decrease of EdU positive cell by SHARPIN knocking down (Figure 4D, Supplementary Figure 4B).

### SHARPIN associates with ER $\alpha$ both in cytoplasm and nuclear, but does not transcriptionally facilitates ER $\alpha$ signaling

The cytoplasmic and nuclear separation assay shows that SHARPIN is mainly localized in the cytoplasm (Figure 5A). Interestingly, 20 minutes of E2 treatment could promote the trans-location of SHARPIN from cytoplasm into nucleus (Figure 5B). Immuno-precipitation (IP) shows that SHARPIN could associate with ER $\alpha$  both in the cytosol and nucleus (Figure 5C and 5D). The trans-location of SHARPIN is further confirmed by immunocytochemistry (Figure 5E). However, there are two possibilities for SHARPIN effect on ER $\alpha$  signaling-transcriptional regulation or protein regulation. We deplete SHARPIN and collect mRNA and protein as early as 24 h. The ER $\alpha$  mRNA and protein level are both decreased at this time point (Figure 5F). Then, this give rises to two possible models that SHARPIN may regulate ER $\alpha$  gene expression by co-occupied with ER $\alpha$  on the target gene promoter regions. Seven promoters are identified from ER $\alpha$  gene, while it is already known that promoter A and B is commonly active in MCF-7 cells [21]. We perform chromatin immuno-precipitation (ChIP) by SHARPIN antibody, while ER $\alpha$  based ChIP is used as the positive

**Table 3: estrogen signaling related genes changed by SHARPIN knockdown**

|                                            |          | Fold Change | Expected change by estrogen |
|--------------------------------------------|----------|-------------|-----------------------------|
| Estrogen-dependent breast cancer signaling | ATF2     | -1.785      | Up                          |
| Estrogen-dependent breast cancer signaling | CCND1    | -1.808      | Up                          |
| Estrogen-dependent breast cancer signaling | CREB1    | -1.815      | Up                          |
| Estrogen-dependent breast cancer signaling | ESR1     | -1.766      | up                          |
| Estrogen-dependent breast cancer signaling | HSD17B14 | -1.814      | down                        |
| Estrogen-dependent breast cancer signaling | KRAS     | 1.814       | up                          |
| Estrogen-dependent breast cancer signaling | NRAS     | -1.801      | up                          |
| Estrogen receptor signaling                | CARM1    | 1.795       | none                        |
| Estrogen receptor signaling                | CDK8     | 1.801       | none                        |
| Estrogen receptor signaling                | ESR1     | -1.766      | Up                          |
| Estrogen receptor signaling                | GTF2H1   | -1.812      | up                          |
| Estrogen receptor signaling                | HDAC3    | 1.782       | up                          |
| Estrogen receptor signaling                | HNRNPD   | 1.784       | up                          |
| Estrogen receptor signaling                | KRAS     | 1.814       | up                          |
| Estrogen receptor signaling                | MED1     | -1.798      | none                        |
| Estrogen receptor signaling                | NR3C1    | -1.759      | up                          |
| Estrogen receptor signaling                | NRAS     | -1.801      | up                          |
| Estrogen receptor signaling                | RBFOX2   | 1.815       | down                        |
| Estrogen receptor signaling                | SRA1     | 1.796       | none                        |
| Estrogen receptor signaling                | TAF9     | -1.815      | up                          |
| Estrogen receptor signaling                | TAF11    | -1.795      | none                        |
| Estrogen receptor signaling                | TAF13    | -1.798      | none                        |
| Estrogen-mediated S-phase Entry            | CCND1    | -1.808      | up                          |
| Estrogen-mediated S-phase Entry            | CDK2     | -1.811      | up                          |
| Estrogen-mediated S-phase Entry            | CDKN1A   | 1.8         | Down                        |
| Estrogen-mediated S-phase Entry            | CDKN1B   | -1.79       | Down                        |
| Estrogen-mediated S-phase Entry            | E2F4     | 1.806       | up                          |
| Estrogen-mediated S-phase Entry            | E2F6     | 1.769       | up                          |
| Estrogen-mediated S-phase Entry            | ESR1     | -1.766      | Up                          |
| Estrogen-mediated S-phase Entry            | MYC      | -1.816      | Up                          |

control. However, SHARPIN based ChIP fails to detect the promoter binding of ER $\alpha$  and its classical target genes, such as IL20 and PKIB (Figure 5G and 5H).

### SHARPIN stabilizes ER $\alpha$ protein possibly through mono-ubiquitinating ER $\alpha$ at K302/303 sites

Since SHARPIN does not regulate ER $\alpha$  in transcription level, we infer that SHARPIN might

regulate ER $\alpha$  through post-translational mechanisms. Upon inhibition of protein synthesis by cycloheximide, the presence of SHARPIN significantly prolongs the half-life of ER $\alpha$  protein in HEK293 cells (Figure 6A, Supplementary Figure 5). With the treatment of proteasome inhibitor MG132, we observe the decrease of expected poly-ubiquitin chains in the presence of SHARPIN (Figure 6B). By applying ubiquitin plasmid with all lysine mutants (Ub KO), we find that SHARPIN increases the mono-ubiquitinated ER $\alpha$  (Figure 6C). This

suggests that SHARPIN might stabilize ER $\alpha$  by mono-ubiquitination. Since the amino acid lysine 302 and 303 sites are the frequently reported sites involving in mono-ubiquitination, we mutate the two sites into alanine. Figure 6D shows that SHARPIN could decrease the poly-

ubiquitin chain in wild type ER $\alpha$  which could be rescued in ER $\alpha$  with K302/303 mutation. The Ub KO based immuno-precipitation shows that SHARPIN increases wild type ER $\alpha$  mono-ubiquitination, while it has decreased mono-ubiquitination chain in ER $\alpha$  302/303 mutant (Figure

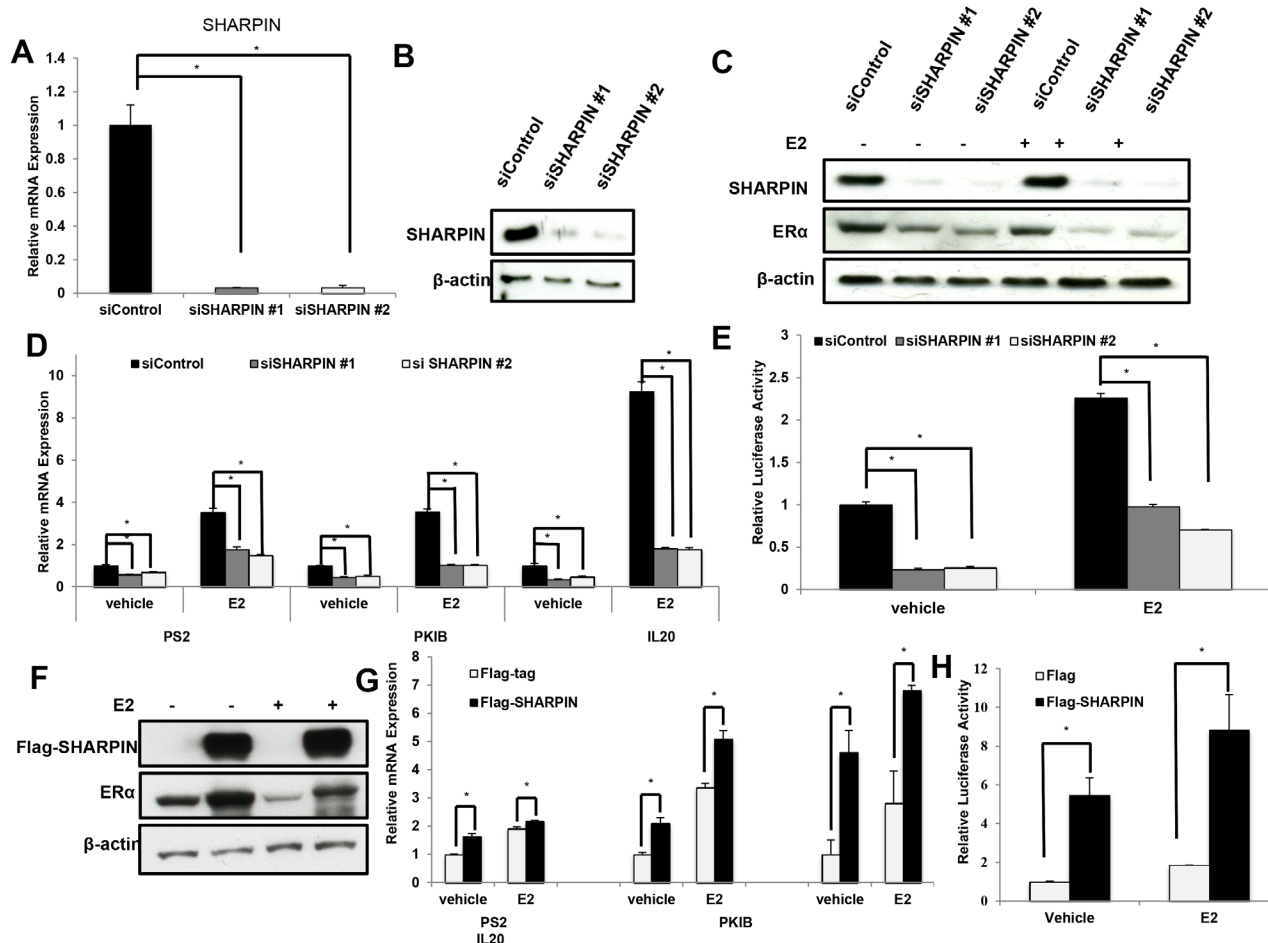

**Figure 3: SHARPIN controls ER $\alpha$  signaling activity in breast cancer cells.** (A) and (B) SHARPIN depletion effect by two different siRNA oligos. MCF-7 cells are transfected with siSHARPIN or siControl. After 48 h, SHARPIN mRNA and protein levels are determined by Western blot analysis.  $\beta$ -actin was used as internal control. (C) SHARPIN depletion effect on ER $\alpha$  protein level by two different siRNA oligos. MCF-7 cells were transfected with siSHARPIN or siControl. After 48 h, cells were treated with either ethanol or 10 nM estradiol for 6 h. SHARPIN and ER $\alpha$  protein levels were determined by Western blot analysis.  $\beta$ -actin was used as internal control. (D) SHARPIN depletion decreases ER $\alpha$  target genes using two different siRNA oligos. MCF-7 cells were transfected with siSHARPIN or siControl. After 48 h, cells were treated with either ethanol or 10 nM estradiol for 6 h. Total RNA was prepared and the expression of the endogenous ER $\alpha$  target genes, PS2, PKIB, and IL20 were determined by real-time PCR. Shown are the results from three experiments. \* $P < 0.05$  for siSHARPIN versus siControl. (E) SHARPIN depletion affects ERE-luciferase activity in MCF7 cells. MCF7 cells were transfected with siSHARPIN or siControl together with ERE luciferase reporter plasmid. Cells were treated with 10 nM estradiol or vehicle. Luciferase activity was measured 48 h after transfection. Shown are the results from three experiments. \* $P < 0.05$  for siSHARPIN versus siControl. (F) SHARPIN overexpression effect on ER $\alpha$  protein level. MCF-7 cells were transfected with SHARPIN plasmid or Flag empty vector. After 48 h, cells were treated with either ethanol or 10 nM estradiol for 6 h. SHARPIN and ER $\alpha$  protein levels were determined by Western blot analysis.  $\beta$ -actin was used as internal control. (G) SHARPIN overexpression increases ER $\alpha$  target genes. MCF-7 cells were transfected with SHARPIN plasmid or Flag empty vector. After 48 h, cells were treated with either ethanol or 10 nM estradiol for 6 h. Total RNA was prepared and the expression of the endogenous ER $\alpha$  target genes, PS2, PKIB, and IL20 were determined by real-time PCR. Shown are the results from three experiments. \* $P < 0.05$  for SHARPIN overexpression versus Control. (H) SHARPIN depletion affects ERE-luciferase activity in MCF7 cells. MCF-7 cells were transfected with SHARPIN plasmid or Flag empty vector, together with ERE luciferase reporter plasmid. Cells were treated with 10 nM estradiol or vehicle. Luciferase activity was measured 48 h after transfection. Shown are the results from three experiments. \* $P < 0.05$  for SHARPIN overexpression versus Control.

6E). In consistent with this, even SHARPIN increases ERE luciferase activity in wild type ER $\alpha$ , the ER $\alpha$  302/303 mutations has impaired response to SHARPIN (Figure 6F).

## DISCUSSION

In our study, we demonstrate that one ubiquitin binding protein SHARPIN, which is correlated with ER $\alpha$  expression in clinical breast tumor samples, potentiates ER $\alpha$  signaling activity and promotes tamoxifen

resistance through post-translational modifications. SHARPIN stabilizes ER $\alpha$  protein and prohibits its poly-ubiquitination, possibly by inducing ER $\alpha$  mono-ubiquitination at 302/303 sites.

The relationship between estrogen signaling and breast cancer was revealed since 1934 [22]. The further discovery showed the significant benefit for ER $\alpha$  antagonists in breast cancer treatments [23]. However, endocrine resistance is still a big problem for ER $\alpha$  target therapy [24]. Interestingly, most of the endocrine resistance tumors are still ER $\alpha$  positive. Breast cancer

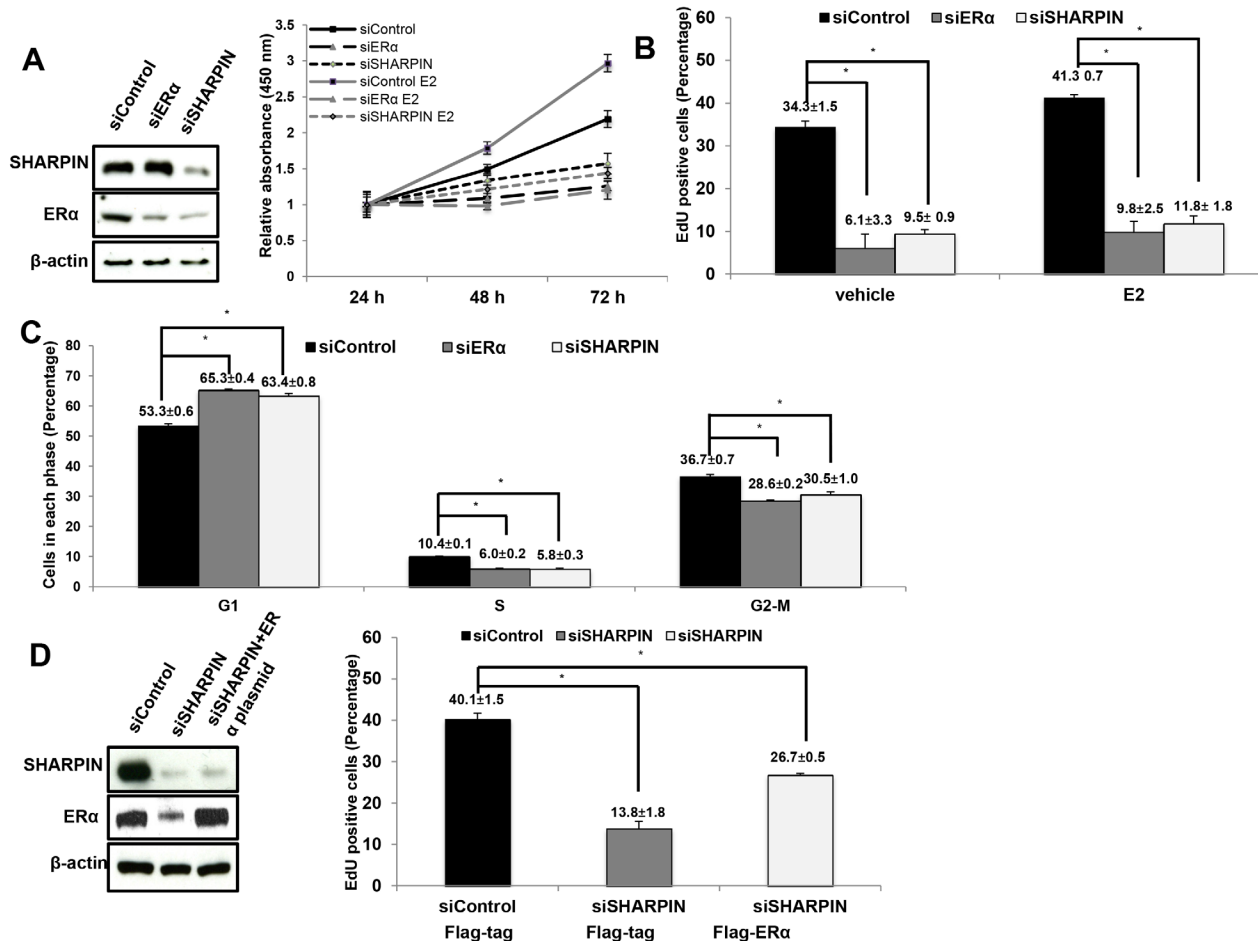

**Figure 4: SHARPIN facilitates estrogen-stimulated cell proliferation in breast cancer cells.** (A) The WST-1 assay was used to determine the cellular metabolic activity at indicated time points after transfection. MCF7 cells were transfected with siSHARPIN and siControl. After 24 h, cells were seeded into the 96 well plates with or without estradiol treatment. ER $\alpha$  depletion was used as the positive control. These experiments were done in triplicates. All values are mean  $\pm$  s.d. ( $n = 3$ ,  $*P < 0.05$ ). SHARPIN and ER $\alpha$  protein levels were determined by Western blot analysis.  $\beta$ -actin was used as internal control. (B) SHARPIN knockdown decreases cell proliferation in MCF-7 cells as determined by EdU incorporation. MCF7 cells were transfected with siSHARPIN and siControl. ER $\alpha$  depletion was used as the positive control. Cells were treated with or without estradiol. EdU was added at a concentration of 10  $\mu$ M and incubated for 1 h. The cells were subject to FACS analysis. All values are mean  $\pm$  s.d. ( $n = 3$ ,  $*P < 0.05$ ). (C) SHARPIN knockdown induces G1 cell cycle arrest and inhibits estradiol-stimulated cell proliferation. The effects of SHARPIN knockdown were compared with siControl. ER $\alpha$  knockdown was used as the positive control. Cells were treated with estradiol or vehicle for 24 h. The proportion of cells in each phase was measured by fluorescent-activated cell sorting. All values are mean  $\pm$  s.d. ( $n = 3$ ,  $*P < 0.05$ ). (D) The decreased cell proliferation by SHARPIN knockdown could be partially rescued by ER $\alpha$  over-expression. MCF7 cells were transfected with siSHARPIN and siControl. After 24 h, siSHARPIN group was transfected with ER $\alpha$  plasmid, while the other groups were transfected with empty vector. EdU was added at a concentration of 10  $\mu$ M and incubated for 1 h. The cells were subject to FACS analysis. All values are mean  $\pm$  s.d. ( $n = 3$ ,  $*P < 0.05$ ).



cells get endocrine resistance through ER $\alpha$  modifications, including phosphorylation, ubiquitination and acetylation, to overcome the blocking effect by ER $\alpha$  antagonists [25, 26]. Even the post-translational modifications spread in ER $\alpha$  protein, only a few sites affect the ER $\alpha$  function, such as the modifications in the hinge domain of ER $\alpha$  [27–29]. The modifications in the hinge domain of ER $\alpha$  could affect the protein conformation and subsequent ligand/DNA binding affinity [30]. Quite a few studies

have shown several key modification sites for ER $\alpha$  activity, including lysine 302/303 and serine 305 [31, 32]. For example, the p21-activated kinase family proteins were shown to facilitate ER $\alpha$  signaling by phosphorylating S305 site, increasing protein stability and promoting tamoxifen resistance [8, 33]. Besides, mono-ubiquitination on K302/303 sites was also shown to promote ER $\alpha$  protein stability and ER $\alpha$  signaling activity [34]. Here, our research firstly identified the ubiquitin

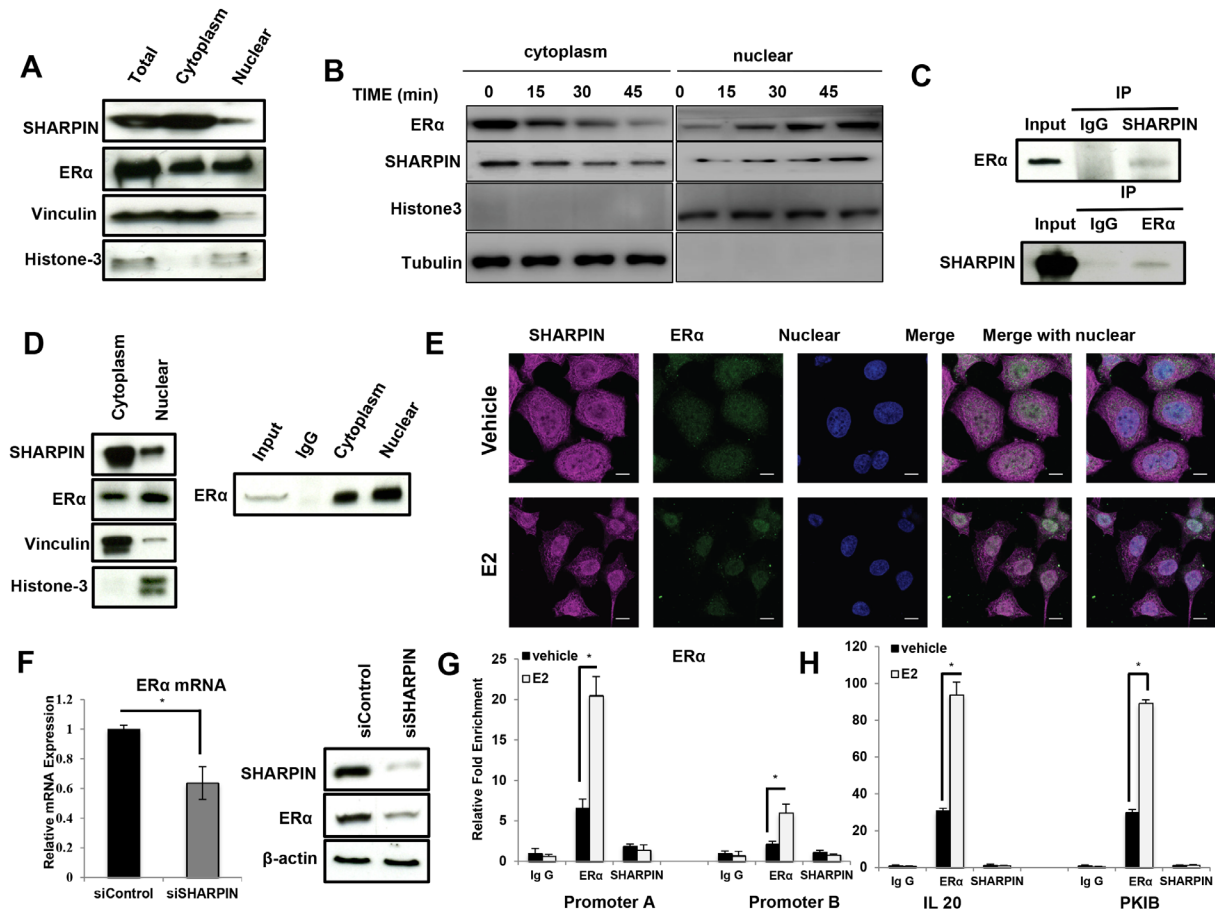

**Figure 5: SHARPIN associates with ER $\alpha$  both in the cytoplasm and nuclear, but does not transcriptionally regulate ER $\alpha$  and its target genes.** (A) SHARPIN protein is mainly localized in the cytoplasm. The subcellular protein fractionation kit (Thermo scientific, 78840) was used for cytoplasm and nuclear separation. Vinculin and Histone-3 were used for cytoplasm and nuclear control. (B) SHARPIN protein could shuttle into nuclear by estradiol treatment. Cells were subject to estradiol treatment for indicated time points (15min, 30min and 45min). The subcellular protein fractionation kit (Thermo scientific, 78840) was used for cytoplasm and nuclear separation. Vinculin and Histone-3 were used for cytoplasm and nuclear control. (C) Co-IP assay reveals association between endogenous SHARPIN and ER $\alpha$  in MCF7 cells. (D) SHARPIN protein could associate with ER $\alpha$  both in the cytoplasm and nuclear. The subcellular protein fractionation kit (Thermo scientific, 78840) was used for cytoplasm and nuclear separation. Vinculin and Histone-3 were used for cytoplasm and nuclear control. (E) Intracellular localization analysis of SHARPIN and ER $\alpha$  by immunofluorescence assay. MCF7 cells were treated with 10 nM estradiol or vehicle for 30 min before fixation. Intracellular localization of SHARPIN (pink) and ER $\alpha$  (green) were shown. Nuclei (blue), 4', 6-diamidino-2-phenylindole (DAPI). (F) SHARPIN depletion effect on ER $\alpha$  mRNA and protein level. The total mRNA and protein were collected 24 h after siSHARPIN transfection. (G) ChIP assay for ER $\alpha$  and SHARPIN recruitment to ER $\alpha$  promoter A and B. MCF7 cells were treated with 10 nM estradiol or vehicle for 30 min before fixation. Rabbit Ig G was used as the negative control, while ER $\alpha$  antibody was used as the positive control. The primer sequences were shown in Supplementary Table 1. All values are mean  $\pm$  s.d. (n = 3, \*P < 0.05). (H) ChIP assay for ER $\alpha$  and SHARPIN recruitment to IL20 and PKIB promoter regions. MCF7 cells were treated with 10 nM estradiol or vehicle for 30 min before fixation. Rabbit IgG was used as the negative control, while ER $\alpha$  antibody was used as the positive control. The primer sequences were shown in Supplementary Table 1. All values are mean  $\pm$  s.d. (n = 3, \*P < 0.05).

binding protein SHARPIN and its possible link for K302/K303 modification with tamoxifen resistance. We believe that the novel found ER $\alpha$  modifiers will not only help to understand the complexity of ER $\alpha$  signaling, but also increase the knowledge of less known ubiquitin binding proteins in nuclear receptor function.

SHARPIN protein was firstly found from nerve cells and characterized as the SHARK-interaction protein [17]. Further studies revealed that SHARPIN

could associate with integrin and inhibit cell migration [35]. One of the most important finding is that SHARPIN is necessary for intact immune response. SHARPIN was shown to be the component of linear ubiquitin assembly complex (LUBAC) and facilitate NF- $\kappa$ B signaling transduction [36]. SHARPIN depletion will impair the linear ubiquitination of IKK $\alpha$ , which will cripple the P65/P50 translocation into the nuclear [37]. Phenotypically, SHARPIN knockout mice present with

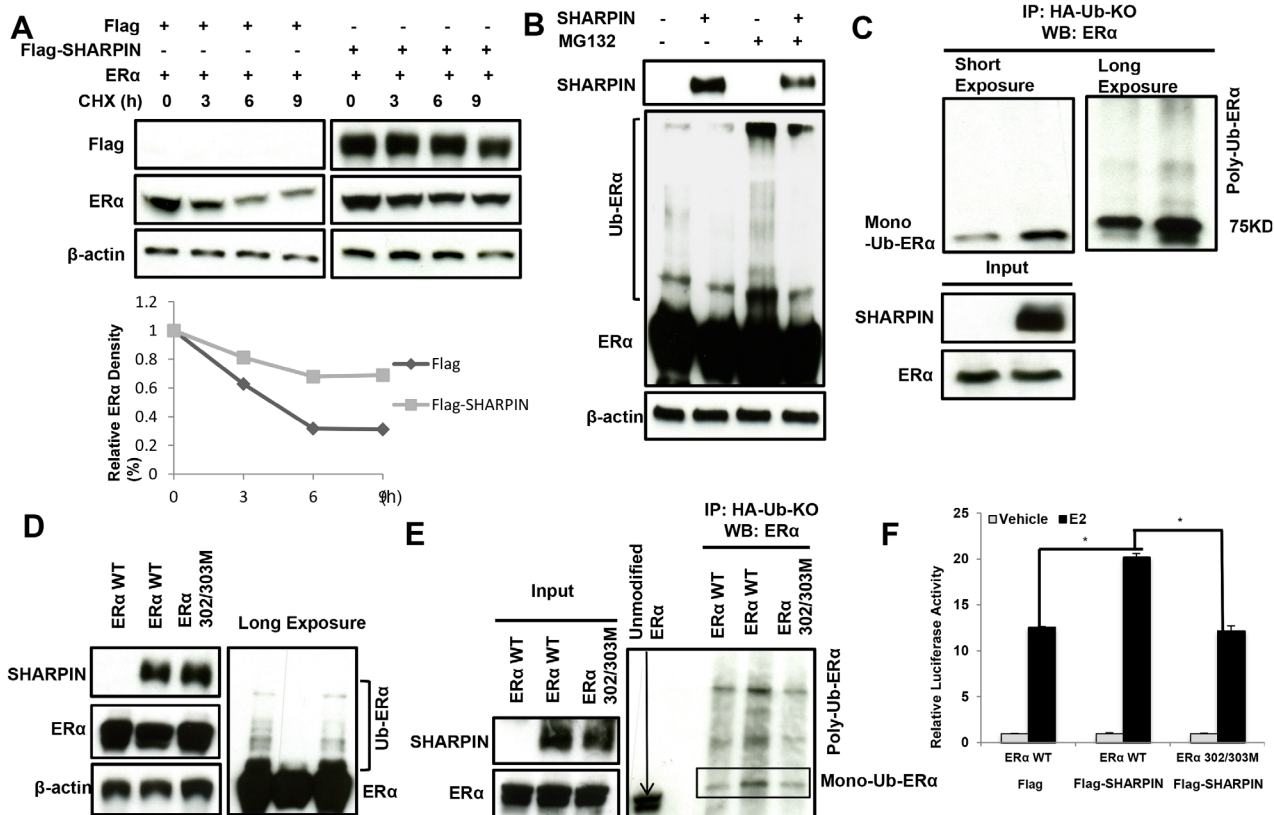

**Figure 6: SHARPIN stabilizes ER $\alpha$  by promoting its mono-ubiquitination at K302/303 sites.** (A) SHARPIN increases ER $\alpha$  half-life in HEK293 cells. HEK293 cells were transfected with 0.5  $\mu$ g ER $\alpha$  plasmid and 0.5  $\mu$ g Flag-tag or Flag-SHARPIN plasmids. After 24 h, cells were treated with 100  $\mu$ M cycloheximide/vehicle for indicated times. Cell lysates were prepared for Western blot analysis. The results are representative for three independent experiments. (B) SHARPIN prohibits ER $\alpha$  poly-ubiquitination. HEK293 cells were transfected with 0.5  $\mu$ g ER $\alpha$  plasmid and 0.5  $\mu$ g Flag-tag or Flag-SHARPIN plasmids. After 24 h, cells were treated with 10  $\mu$ M MG132 or vehicle for 6 hours. Cells were directly harvested and Western blot analysis using ER $\alpha$  antibody was used to detect ubiquitinated ER $\alpha$  forms. The predicted molecular weight of polyubiquitinated ER $\alpha$  is indicated. (C) Direct evidence for ER $\alpha$  mono-ubiquitination by SHARPIN protein. HEK293 cells were transfected with 0.5  $\mu$ g ER $\alpha$  plasmid, 0.5  $\mu$ g HA-Ub-KO plasmid and 0.5  $\mu$ g Flag-tag or Flag-SHARPIN plasmids. The cell extracts were immuno-precipitated with HA antibody. Mono-ubiquitinated ER $\alpha$  was detected via western blotting analysis. (D) The poly-ubiquitination inhibition effect by SHARPIN depends on ER $\alpha$  302/303 sites. HEK293 cells were transfected with 0.5  $\mu$ g ER $\alpha$  plasmid (or ER $\alpha$  302/303AA mutant) and 0.5  $\mu$ g Flag-tag or Flag-SHARPIN plasmids. After 24 h, cells were treated with 10  $\mu$ M MG132 or vehicle for 6 hours. Cells were directly harvested and Western blot analysis using ER $\alpha$  antibody was used to detect ubiquitinated ER $\alpha$  forms. The predicted molecular weight of polyubiquitinated ER $\alpha$  is indicated. (E) Direct evidence for ER $\alpha$  mono-ubiquitination at 302/303 sites. HEK293 cells were transfected with 0.5  $\mu$ g ER $\alpha$  plasmid (or ER $\alpha$  302/303AA mutant), 0.5  $\mu$ g HA-Ub-KO plasmid and 0.5  $\mu$ g Flag-tag or Flag-SHARPIN plasmids. The cell extracts were immuno-precipitated with HA antibody. Mono-ubiquitinated ER $\alpha$  was detected via western blotting analysis. (F) ER $\alpha$ -lysine 302/303 is necessary for the SHARPIN mediated ER $\alpha$  signaling. Flag-SHARPIN or Flag control and ER $\alpha$  wild type or ER $\alpha$  302/302AA were transfected in the indicated combinations in HEK293 cells. 24 h before measurement, cells were transfected with an ERE luciferase reporter. After 18 h, cells were treated with 10 nM estradiol or vehicle, and an ERE-luciferase assay was carried out 6 h after E2 addition. Shown values represent mean  $\pm$  s.d. (n = 3), which is representative for three independent experiments. \* -  $P < 0.05$  for Flag-SHARPIN group versus control, according to t-test.

chronic proliferative dermatitis and impaired B and T cell development [38–40]. However, less is known about SHARPIN function in human cancer, even it endure a high gene amplification in TCGA database, such as pancreatic cancer and breast cancer (<http://www.cbioportal.org>). Interestingly, our study reveals that SHARPIN is not only higher expressed in breast cancer, but also correlates with ER $\alpha$  protein level and poor tamoxifen response. Besides, our study further shows SHARPIN involves in ER $\alpha$  mono-ubiquitination at K302/303 sites, which is a novel ubiquitination manner for SHARPIN protein. Although our previous study showed another component-RNF31 could also promote ER $\alpha$  mono-ubiquitination in breast cancer cells, the RNF31 modification effect on ER $\alpha$  is not dependent on the Ubiquitin-associated domain (UBA), which is necessary for LUBAC formation. Thus, we believe that SHARPIN mono-ubiquitinates ER $\alpha$ , which is independent of RNF31 or LUBAC function [13].

In the study, we examine the role of SHARPIN in ER $\alpha$  positive breast cancer cells. SHARPIN is shown to associate ER $\alpha$  protein and prolong its stability via mono-ubiquitination at ER $\alpha$  hinge domain. Since the ER $\alpha$  signaling is required for breast cancer proliferation, modulation of ER $\alpha$  protein could be an approach to inhibit breast cancer cell progression and restore endocrine resistance. Besides, our unpublished data also shows SHARPIN promotes several oncogenic pathways, including hypoxia induced factors and AKT pathways. In all, SHARPIN could be a promising therapeutic strategy for breast cancer treatment.

## CONCLUSIONS

This study identifies the first time, the ubiquitin binding protein SHARPIN as a modulator of ER $\alpha$  signaling in human breast cancer cells. Importantly, SHARPIN depletion could rescue tamoxifen sensitivity, hamper estrogen-dependent cell proliferation and decrease ER $\alpha$  signaling in multiple breast cancer cell lines. As a novelly discovered modulator for ER $\alpha$  signaling, SHARPIN could be a promising target to overcome endocrine therapy resistance.

## MATERIALS AND METHODS

### Cell culture

MCF-7 and HEK293 cells were cultured in DMEM (Invitrogen, Carlsbad, CA) supplemented with 10% fetal bovine serum (FBS) and 1% penicillin/streptomycin (Invitrogen) at 37°C in a humidified atmosphere of 5% CO<sub>2</sub> in air. T47D cells were cultured in RPMI 1640 (Invitrogen) supplemented with 10% FBS (GIBCO) and 1% penicillin/streptomycin.

## Plasmids

SHARPIN (pcDNA-Flag-SHARPIN) construct was kindly presented from Dr. Kazuhiro Iwai and was previously described. The pcDNA3-ER $\alpha$  plasmid, HA-ubiquitin-KO plasmid, the ERE-TK-luciferase reporter and the pRL-TK control were described in previous study [13]. The ER $\alpha$  302/303 mutants (lysine to alanine) were described in previous paper [16, 37].

## siRNA and plasmids transfection

Cells were transfected with 50 nM siRNA. SHARPIN siRNAs sequences were shown here: SHARPIN siRNA #1: CUGC UUUCCUCUACUUGC UdTdT; siRNA #2: GCUUCCUCUACUUGCUG UdTdT. p53 siRNA and control siRNA are Stealth Select siRNA (Invitrogen). INTERFERin transfection reagent (Polyplus Transfection, 409-10) was used according to the manufacturer's protocol. Plasmids were transfected by Lipofectamin 2000 (1662298, Invitrogen).

## RNA extraction and real-time PCR analysis

RNeasy kits were used to extract total RNA (Qiagen). Real-time PCR was performed as previously described. 36B4 was used as internal control. Primer sequences for Real-time PCR are provided in Supplementary Table.

## Quantification of cell viability

MCF-7 and T47D cells were transfected with siSHARPIN or siControl in 24-well plates. After 24 h, the cells were seeded into 96-well plates. Estrogen and vehicle were added in each group. Cell numbers were determined using the WST-1 cell proliferation reagent as previously described [8].

## Flow cytometry

For ethynly-deoxyuridine (EdU) labeled DNA stain, cells were transfected with siSHARPIN, siER $\alpha$  and siControl. After 24 h, 10 nM estradiol or vehicle was added for another 24 h. Then 10  $\mu$ M EdU was added into each plate for the last 60 min. For propidium iodide staining, MCF7 cells were seeded into 10-cm dishes. After 24 h, cells were transfected with siSHARPIN, siER $\alpha$  and siControl. After another 24 h, cells were fixed with 70% ethanol for 30 min and stained with propidium iodide. For the ER $\alpha$  rescue experiment, MCF7 cells were seeded into 10-cm dishes. After 24 h, cells were transfected with siSHARPIN, and siControl. After another 24 h, siSHARPIN group was transfected with 5  $\mu$ g ER $\alpha$  plasmid, while other groups were transfected with 5  $\mu$ g Flag vector. The BD LSR II flow cytometer (BD Bioscience) was used to measure the flow fluorescence intensity.

## Western blotting

Cells were lysed with RIPA lysis buffer. Anti-ER $\alpha$  (HC-20, SC543) was from Santa Cruz Biotechnology. Anti-SHARPIN (AB69507), and anti-FLAG (M2, ab48763) were acquired from Abcam. Anti-actin (8H10D10) was acquired from Cell Signaling Technology.

## Immunoprecipitation

Immunoprecipitation was performed as previous described [41]. 100  $\mu$ g cell lysates were pre-cleared with Rabbit IgG for 2 h and subsequently incubated with SHARPIN antibody (AB69507) over night, while rabbit IgG was used as the negative control. The bound protein was analyzed by ER $\alpha$  antibody (1DO5, santa cruz). For the overexpression experiment, HEK293 cells were transfected with 5  $\mu$ g Flag-SHARPIN and ER $\alpha$  plasmid in 10 cm dish. Cell lysates were pre-cleared with IgG and subsequently incubate with Flag antibody or ER $\alpha$  antibody, while rabbit IgG was used as the negative control. The bound proteins were analyzed by western blotting.

## Protein stability assays

HEK293 cells ( $10^5$ ) were seeded into 24 well plates and transfected with 0.5  $\mu$ g ER $\alpha$  plasmid together with 0.5  $\mu$ g Flag-SHARPIN or empty Flag vector. After 48 h, cells were treated with 100  $\mu$ M cycloheximide for indicated time points. Samples were subject to western blot for ER $\alpha$  degradation.

## Analysis of protein ubiquitination

HEK293 cells were transfected with 4  $\mu$ g ER $\alpha$  (or ER $\alpha$  302/302AA mutant) plasmid together with 4  $\mu$ g Flag-SHARPIN or empty Flag vector. After 48 h, cells were treated with 10  $\mu$ M MG132 or ethanol for 6 h. Cells were directly harvested. The poly-ubiquitination of ER $\alpha$  was detected by western blotting analysis.

## Mono-ubiquitination detection assay

To directly detect the enriched mono-ubiquitinated ER $\alpha$  from the cell extracts, HEK293 cells were transfected with 4  $\mu$ g HA-UB-KO plasmid, 4  $\mu$ g ER $\alpha$  (or ER $\alpha$  302/302AA mutant) together with 4  $\mu$ g Flag-SHARPIN or Flag-vector. After 48 h, total protein was extracted and pre-cleared by 20  $\mu$ l protein A (santa cruz, SC-2001) for 2 h. The supernatant was corrected and immuno-precipitated by HA antibody. Western blot with rabbit anti-ER $\alpha$  antibody was performed to detect mono-ubiquitinated ER $\alpha$ .

## Luciferase assay

The luciferase activity was done using the Dual-Luciferase Reporter kit (Promega, Germany). The ERE

luciferase reporter was transfected together with renilla plasmid into the cells. The luciferase activity was measured after 24 h.

## Chromatin immuno-precipitation (ChIP) assay

ChIP assay was performed as our previous described [8]. MCF7 cells were treated with vehicle or 10 nM estradiol for 30 minutes before crosslinking. The antibodies were used as follows: SHARPIN (AB69507, abcam), ER $\alpha$  (HC20, santa cruz) and rabbit IgG (sc2027, santa cruz). The sequences for ChIP primers were shown in Supplementary Table.

## Immunofluorescence assay

The immunofluorescence assay was described in detail in our previous study. MCF-7 cells were treated with estradiol or vehicle for 30 min before being fixed with 4% paraformaldehyde in PBS for 10 min, permeabilized with 0.2% Triton X-100 for 5 min, and blocked by 5% BSA in PBS for 1 h. A rabbit anti-SHARPIN polyclonal antibody and mouse anti-monoclonal antibodies were used, followed by Alexa Fluor 647 (Invitrogen) anti-rabbit antibody and FITC-conjugated anti-mouse antibodies (Jackson Immuno-Research, West Grove, PA).

## RNA sequence analysis

The global gene expression analysis was based on RNA sequencing platform from BGI (Beijing Genomic Institute). The RNA sequence data are deposited in the Gene Expression Omnibus (GEO) database (Assessing number: GSE77261). Analysis was performed for differentially expressed genes ( $P < 0.01$  and fold change  $> 2$ ) by Ingenuity Pathway Analysis (IPA).

## Analysis of gene expression in publicly available data sets

Analysis of SHARPIN expression in 62 paired normal breast tissues and breast cancer samples from The Cancer Genome Atlas (TCGA) was carried out in the statistical environment R. The relapse-free survival data of tamoxifen-only treated patients were acquired from KMPlot database (<http://kmplot.com/analysis/>).

## Clinical breast tumor samples

One hundred and twenty two formalin-fixed paraffin-embedded breast cancer samples were collected from the Department of Pathology, Shandong Qilu Hospital. All the breast tumors samples were examined by ER $\alpha$  status, PR status, HER2 status by pathological specialists. The pathological grade plus lymph node metastasis status of each sample was also examined by pathological specialists.

## Statistics

Student's t-test, Pearson correlation coefficient and Cox regression analysis were used for comparisons. A P-value of < 0.05 was considered to be significant.

## CONSENT

### Ethics, consent and permissions

This study was reviewed and approved by the Ethical Board at the Qilu Hospital of Shandong University with written informed consent from all the patients.

### Consent for publication

Not applicable.

### Availability of supporting data

Additional data are available as Supplementary Information.

### Author contributions

T. Z., S. Y., and L. Z. performed most of the bench work. J. Z., T. Z., W. H., K. M. and XM. L. supervised the process of the study and performed the manuscript writing. H. Y., X. L., Y. H., Z. L., Y. S., W. W., N. Y., A. L. and XF. L. participated in western blot, real time PCR and flow cytometry work. G. N., J. X. and M. S. H. performed the RNA-sequence data analysis.

## ACKNOWLEDGMENTS

We thank all the members of Xinxiang Medical University Immunology research center for sharing valuable material and research support.

## CONFLICTS OF INTEREST

The authors declare no conflict of interest.

## FUNDING

The project was supported by the National Natural Science Foundation of China (No.U1604190, Jian Zhu; No. 81572594, Kun Mu; No. 81602443, Xuefeng Li), the Foundation of Henan Educational Committee (No.16A310014, Jian Zhu; No.17A310025, Ting Zhuang), the Program for Innovative Research Team (in Science and Technology) in University of Henan Province (No.15IRTSTHN025, Hui Wang), the National High Technology Research and Development Program of China (863 Program) (No. 2012AA02A201-1, Xiumin Li), and the Program for Ph.D. starting research funding from

Xinxiang Medical University (Jian Zhu and Ting Zhuang). This study is also funded by the innovative practice center of medical graduates, Yashijie medical laboratory institute, School of laboratory medicine, Xinxiang Medical University, and the support project for the Disciplinary group of Oncology and Immunology, Xinxiang Medical University.

## REFERENCES

1. Siegel RL, Miller KD, Jemal A. Cancer statistics, 2016. *CA Cancer J Clin.* 2016; 66:7–30.
2. Parker JS, Mullins M, Cheang MC, Leung S, Voduc D, Vickery T, Davies S, Fauron C, He X, Hu Z, Quackenbush JF, Stijleman IJ, Palazzo J, et al. Supervised risk predictor of breast cancer based on intrinsic subtypes. *J Clin Oncol.* 2009; 27:1160–67.
3. Musgrove EA, Sutherland RL. Biological determinants of endocrine resistance in breast cancer. *Nat Rev Cancer.* 2009; 9:631–43.
4. Shou J, Massarweh S, Osborne CK, Wakeling AE, Ali S, Weiss H, Schiff R. Mechanisms of tamoxifen resistance: increased estrogen receptor-HER2/neu cross-talk in ER/HER2-positive breast cancer. *J Natl Cancer Inst.* 2004; 96:926–35.
5. Osborne CK, Bardou V, Hopp TA, Chamness GC, Hilsenbeck SG, Fuqua SA, Wong J, Allred DC, Clark GM, Schiff R. Role of the estrogen receptor coactivator AIB1 (SRC-3) and HER-2/neu in tamoxifen resistance in breast cancer. *J Natl Cancer Inst.* 2003; 95:353–61.
6. Girault I, Bièche I, Lidereau R. Role of estrogen receptor alpha transcriptional coregulators in tamoxifen resistance in breast cancer. *Maturitas.* 2006; 54:342–51.
7. Nakshatri H, Bhat-Nakshatri P, Martin DA, Goulet RJ Jr, Sledge GW Jr. Constitutive activation of NF-kappaB during progression of breast cancer to hormone-independent growth. *Mol Cell Biol.* 1997; 17:3629–39.
8. Zhuang T, Zhu J, Li Z, Lorent J, Zhao C, Dahlman-Wright K, Strömblad S. p21-activated kinase group II small compound inhibitor GNE-2861 perturbs estrogen receptor alpha signaling and restores tamoxifen-sensitivity in breast cancer cells. *Oncotarget.* 2015; 6:43853–68. <https://doi.org/10.18632/oncotarget.6081>.
9. Donley C, McClelland K, McKeen HD, Nelson L, Yakkundi A, Jithesh PV, Burrows J, McClements L, Valentine A, Prise KM, McCarthy HO, Robson T. Identification of RBCK1 as a novel regulator of FKBPL: implications for tumor growth and response to tamoxifen. *Oncogene.* 2014; 33:3441–50.
10. Karamouzis MV, Konstantinopoulos PA, Badra FA, Papavassiliou AG. SUMO and estrogen receptors in breast cancer. *Breast Cancer Res Treat.* 2008; 107:195–210.
11. Eakin CM, Maccoss MJ, Finney GL, Klevit RE. Estrogen receptor alpha is a putative substrate for the

- BRCA1 ubiquitin ligase. *Proc Natl Acad Sci USA*. 2007; 104:5794–99.
12. Zhang QG, Han D, Wang RM, Dong Y, Yang F, Vadlamudi RK, Brann DW. C terminus of Hsc70-interacting protein (CHIP)-mediated degradation of hippocampal estrogen receptor- $\alpha$  and the critical period hypothesis of estrogen neuroprotection. *Proc Natl Acad Sci USA*. 2011; 108:E617–24.
  13. Zhu J, Zhao C, Kharman-Biz A, Zhuang T, Jonsson P, Liang N, Williams C, Lin CY, Qiao Y, Zendejdel K, Strömblad S, Treuter E, Dahlman-Wright K. The atypical ubiquitin ligase RNF31 stabilizes estrogen receptor  $\alpha$  and modulates estrogen-stimulated breast cancer cell proliferation. *Oncogene*. 2014; 33:4340–51.
  14. Zhu J, Zhuang T, Yang H, Li X, Liu H, Wang H. Atypical ubiquitin ligase RNF31: the nuclear factor modulator in breast cancer progression. *BMC Cancer*. 2016; 16:538.
  15. Lonard DM, Nawaz Z, Smith CL, O'Malley BW. The 26S proteasome is required for estrogen receptor- $\alpha$  and coactivator turnover and for efficient estrogen receptor- $\alpha$  transactivation. *Mol Cell*. 2000; 5:939–48.
  16. La Rosa P, Marino M, Acconcia F. 17 $\beta$ -estradiol regulates estrogen receptor  $\alpha$  monoubiquitination. *IUBMB Life*. 2011; 63:49–53.
  17. Lim S, Sala C, Yoon J, Park S, Kuroda S, Sheng M, Kim E. Sharpin, a novel postsynaptic density protein that directly interacts with the shank family of proteins. *Mol Cell Neurosci*. 2001; 17:385–97.
  18. De Melo J, Tang D. Elevation of SIPL1 (SHARPIN) Increases Breast Cancer Risk. *PLoS One*. 2015; 10:e0127546.
  19. Jung J, Kim JM, Park B, Cheon Y, Lee B, Choo SH, Koh SS, Lee S. Newly identified tumor-associated role of human Sharpin. *Mol Cell Biochem*. 2010; 340:161–67.
  20. He L, Ingram A, Rybak AP, Tang D. Shank-interacting protein-like 1 promotes tumorigenesis via PTEN inhibition in human tumor cells. *J Clin Invest*. 2010; 120:2094–108.
  21. Gustafsson N, Zhao C, Gustafsson JA, Dahlman-Wright K. RBCK1 drives breast cancer cell proliferation by promoting transcription of estrogen receptor  $\alpha$  and cyclin B1. *Cancer Res*. 2010; 70:1265–74.
  22. Geschickter CF, Lewis D, Hartman CG. Tumors of the breast related to the oestrin hormone. *Am J Cancer*. 1934; 21:828–59.
  23. Fisher B, Costantino J, Redmond C, Poisson R, Bowman D, Couture J, Dimitrov NV, Wolmark N, Wickerham DL, Fisher ER, Margolese R, Robidoux A, Shibata H, et al. A randomized clinical trial evaluating tamoxifen in the treatment of patients with node-negative breast cancer who have estrogen-receptor-positive tumors. *N Engl J Med*. 1989; 320:479–84.
  24. Takimoto GS, Graham JD, Jackson TA, Tung L, Powell RL, Horwitz LD, Horwitz KB. Tamoxifen resistant breast cancer: coregulators determine the direction of transcription by antagonist-occupied steroid receptors. *J Steroid Biochem Mol Biol*. 1999; 69:45–50.
  25. Thrane S, Lykkesfeldt AE, Larsen MS, Sorensen BS, Yde CW. Estrogen receptor  $\alpha$  is the major driving factor for growth in tamoxifen-resistant breast cancer and supported by HER/ERK signaling. *Breast Cancer Res Treat*. 2013; 139:71–80.
  26. Schiff R, Massarweh S, Shou J, Osborne CK. Breast cancer endocrine resistance: how growth factor signaling and estrogen receptor coregulators modulate response. *Clin Cancer Res*. 2003; 9:447S–54S.
  27. Michalides R, Griekspoor A, Balkenende A, Verwoerd D, Janssen L, Jalink K, Floore A, Velds A, van't Veer L, Neeffjes J. Tamoxifen resistance by a conformational arrest of the estrogen receptor  $\alpha$  after PKA activation in breast cancer. *Cancer Cell*. 2004; 5:597–605.
  28. Tharakan R, Lepont P, Singleton D, Kumar R, Khan S. Phosphorylation of estrogen receptor  $\alpha$ , serine residue 305 enhances activity. *Mol Cell Endocrinol*. 2008; 295:70–78.
  29. Wang C, Fu M, Angeletti RH, Siconolfi-Baez L, Reutens AT, Albanese C, Lisanti MP, Katzenellenbogen BS, Kato S, Hopp T, Fuqua SA, Lopez GN, Kushner PJ, Pestell RG. Direct acetylation of the estrogen receptor  $\alpha$  hinge region by p300 regulates transactivation and hormone sensitivity. *J Biol Chem*. 2001; 276:18375–83.
  30. Zwart W, de Leeuw R, Rondaij M, Neeffjes J, Mancini MA, Michalides R. The hinge region of the human estrogen receptor determines functional synergy between AF-1 and AF-2 in the quantitative response to estradiol and tamoxifen. *J Cell Sci*. 2010; 123:1253–61.
  31. Berry NB, Fan M, Nephew KP. Estrogen receptor- $\alpha$  hinge-region lysines 302 and 303 regulate receptor degradation by the proteasome. *Mol Endocrinol*. 2008; 22:1535–51.
  32. Sentis S, Le Romancer M, Bianchin C, Rostan MC, Corbo L. Sumoylation of the estrogen receptor  $\alpha$  hinge region regulates its transcriptional activity. *Mol Endocrinol*. 2005; 19:2671–84.
  33. de Leeuw R, J. Neeffjes, R. Michalides, A role for estrogen receptor phosphorylation in the resistance to tamoxifen. *Int J Breast Cancer*, 2011. 2011: p. 232435. <https://doi.org/10.4061/2011/232435>.
  34. Barone I, Brusco L, Fuqua SA. Estrogen receptor mutations and changes in downstream gene expression and signaling. *Clin Cancer Res*. 2010; 16:2702–08.
  35. Rantala JK, Pouwels J, Pellinen T, Veltel S, Laasola P, Mattila E, Potter CS, Duffy T, Sundberg JP, Kallioniemi O, Askari JA, Humphries MJ, Parsons M, et al. SHARPIN is an endogenous inhibitor of  $\beta$ 1-integrin activation. *Nat Cell Biol*. 2011; 13:1315–24.
  36. Tokunaga F, Nakagawa T, Nakahara M, Saeki Y, Taniguchi M, Sakata S, Tanaka K, Nakano H, Iwai K. SHARPIN is a component of the NF- $\kappa$ B-activating linear ubiquitin chain assembly complex. *Nature*. 2011; 471:633–36.

37. Ikeda F, Deribe YL, Skånland SS, Stieglitz B, Grabbe C, Franz-Wachtel M, van Wijk SJ, Goswami P, Nagy V, Terzic J, Tokunaga F, Androulidaki A, Nakagawa T, et al. SHARPIN forms a linear ubiquitin ligase complex regulating NF- $\kappa$ B activity and apoptosis. *Nature*. 2011; 471:637–41.
38. Redecke V, Chaturvedi V, Kuriakose J, Häcker H. SHARPIN controls the development of regulatory T cells. *Immunology*. 2016; 148:216–26.
39. Park Y, Jin HS, Lopez J, Lee J, Liao L, Elly C, Liu YC. SHARPIN controls regulatory T cells by negatively modulating the T cell antigen receptor complex. *Nat Immunol*. 2016; 17:286–96.
40. Jeschke A, Catala-Lehnen P, Sieber S, Bickert T, Schweizer M, Koehne T, Wintges K, Marshall RP, Mautner A, Duchstein L, Otto B, Horst AK, Amling M, et al. Sharpin Controls Osteogenic Differentiation of Mesenchymal Bone Marrow Cells. *J Immunol*. 2015; 195:3675–84.
41. Zhu J, Zhao C, Zhuang T, Jonsson P, Sinha I, Williams C, Strömblad S, Dahlman-Wright K. RING finger protein 31 promotes p53 degradation in breast cancer cells. *Oncogene*. 2016; 35:1955–64.
